# Supplementary material for: Antiphospholipid IgG Certified Reference Material ERM®-DA477/IFCC: a tool for aPL harmonization?
Source: publisher site journal article supplement (doi:10.1515/cclm-2025-0032), 2025-03-20
Supplement: Supplementary file [file j_cclm-2025-0032_suppl_001.pdf]

## **Supplementary Material**

### **Supplementary Methods**

#### **Anti- $\beta$ 2GPI and anti-D4-5 IgG detecting in-house ELISA protocol**

We diluted  $\beta$ 2GPI (in-house purified from a pool of 100 healthy donor serum samples, [1]) to a final concentration of 10  $\mu$ g/ml or the D4-5 peptide (kindly produced and gifted by INOVA Diagnostics) to 2.5  $\mu$ g/ml, in 0.05 M Calcium Carbonate pH 9.6.

We added 100  $\mu$ l/well of the diluted antigen ( $\beta$ 2GPI or D4-5) to a 96-multiwell plate (Thermo Fisher Scientific Cat.n° 95029180, Breakable Strip 1x8 EB) and incubated it overnight at 4°C.

The next day, we drained, blocked with 100  $\mu$ l/well PBS/ 1% BSA/ 0.05% NaN<sub>3</sub>, and incubated the plate for one hour RT.

Meanwhile, we centrifuged thawed positive/negative controls, and patient serum samples 5600 RCF 10 min RT, to exclude potential particles/debris which could interfere with the test, and then diluted them at the recommended dilution factors of each assay: 1:50 for anti- $\beta$ 2GPI or 1:101 for anti-D4-5 IgG detection in PBS/0.05% Tween/0.05% NaN<sub>3</sub> (sample diluent). We prepared water-reconstituted CRM in sample diluent at the following conditions:

- for anti- $\beta$ 2GPI IgG detection, at 312.5 IU/mL (1:32), 156.3 IU/mL (1:64), 78.1 IU/mL (1:128), 39.1 IU/mL (1:256), 19.5 IU/mL (1:512), 9.8 IU/mL (1:1024), 4.9 IU/mL (1:2048), According to the manufacturer's specifications 200 IU/mL is the value attributed to CRM tested at the assay recommended dilution factor for patient samples
- for anti-D4-5 IgG detection, at 315.6 % (1:32), 157.8 % (1:64), 78.9 % (1:128), 39.4 % (1:256), and 19.7 % (1:512), percent dilution relative to assay recommended dilution factor

After blocking incubation, we drained the plate and added each diluted sample in duplicate, 100  $\mu$ l/well. We left the plate for two hours at RT.

Near the end of sample incubation, we diluted the conjugate antibody anti-Human IgG ( $\gamma$ -chain specific) –Alkaline Phosphatase antibody produced in goat (Sigma-Aldrich) 1:1000 in PBS/0.05% Tween/0.05% NaN<sub>3</sub>.

We drained and washed the plate with PBS/0.05% Tween/0.05% NaN<sub>3</sub>, 150  $\mu$ l/well three times, and added 100  $\mu$ l/well of conjugate solution. We incubated the conjugate for one hour and thirty minutes at RT.

We drained and washed the plate three times with PBS/0.05% Tween/0.05% NaN<sub>3</sub>, 150  $\mu$ l/well.

We prepared the substrate solution dissolving 1 Phosphatase Substrate tab (Sigma-Aldrich) per 5 ml 0.05 M Magnesium Carbonate pH 9.8. We drained the plate and added the substrate solution, 100  $\mu$ l/well.

We incubated the plate at 37°C for 30,40 and 50 mins: at each incubation time, we performed a 405nm reading. The approximate OD cut-off value set at the 99th percentile, obtained in 100 healthy control subjects, is 0.170 OD for anti- $\beta$ 2GPI and 0.405 OD for anti-D4-5 IgG Detection.

### **CRM's activity against whole $\beta$ 2GPI and $\beta$ 2GPI variants lacking specific domains**

We diluted in-house purified  $\beta$ 2GPI, recombinant  $\beta$ 2GPI wild-type (r-WT) and  $\beta$ 2GPI variants lacking specific domains, in 0.05 M Calcium Carbonate pH 9.6 to a final concentration of 2.5  $\mu$ g/ml and added them to 96 well ELISA plate (Thermo Fisher Scientific Cat.n° 95029180, Breakable Strip 1x8 EB) 100  $\mu$ l/well. The plate was incubated overnight at 4°C.

The next day, we drained the plate and blocked it with 100  $\mu$ l/well PBS/ 1% BSA/ 0.05% NaN<sub>3</sub> for one hour RT.

Meanwhile, we diluted samples in PBS/0.05% Tween/0.05% NaN<sub>3</sub> (sample diluent).

APS patient serum samples were centrifuged 5600 RCF 10 min RT and then diluted at the dilution factor recommended for this assay, 1:50. We diluted water-reconstituted CRM in sample diluent at

the following concentration percents, relative to the dilution factor recommended: 156 % and 39 %. We tested the monoclonal anti-D1 IgG antibody (MBB2) at the second-highest concentration (2.5 µg/ml) of the dose-dependent anti-β2GPI monoclonal reactivity reported in the literature [2]. After blocking incubation, we drained the plate and added the diluted samples in duplicate, 100 µl/well, incubating them for two hours RT.

Near the end of sample incubation, we diluted 1:1000 the conjugate antibody anti-Human IgG (γ-chain specific) –Alkaline Phosphatase antibody produced in goat (Sigma-Aldrich) in PBS/0.05% Tween/0.05% NaN<sub>3</sub>.

At the end of sample incubation, we drained the plate and washed it three times with PBS/0.05% Tween/0.05% NaN<sub>3</sub>, 150 µl/well. We added the conjugate solution 100 µl/well and incubated the plate for one hour and 30 min RT.

After conjugate incubation, we drained the plate and washed it three times with PBS/0.05% Tween/0.05% NaN<sub>3</sub>, 150 µl/well.

We dissolved one tab of phosphatase substrate (Sigma-Aldrich) per 5 ml 0.05 M Magnesium Carbonate pH 9.8 to prepare the substrate solution and added 100 µl/well to the drained plate.

The plate was incubated at 37°C for 30-90 minutes and read at 405nm after each incubation time reported.

## Supplementary Figures

**Figure S1: CRM preparation.** Before testing, we equilibrated water reconstituted 4°C stored CRM at room temperature for at least 1 hour, and gently inverted the vial five times (according to ERM<sup>®</sup>-DA477/IFCC certificate). Subsequently, we diluted CRM in the sample diluent of the specific assay to prepare different concentrations of CRM. We tested each condition in duplicate on three independent runs. For instrumental methods, we independently diluted CRM, preparing 500 µl total volume per condition, and then we split each sample into two tubes (250 µl/tube) to test duplicates. We re-used residual water reconstituted CRM and residual CRM dilutions for the independent runs, storing samples at 4°C between two consecutive runs when necessary. For ELISA methods, due to the smaller quantity of CRM to add, we serially diluted CRM and freshly prepared each condition at every test.

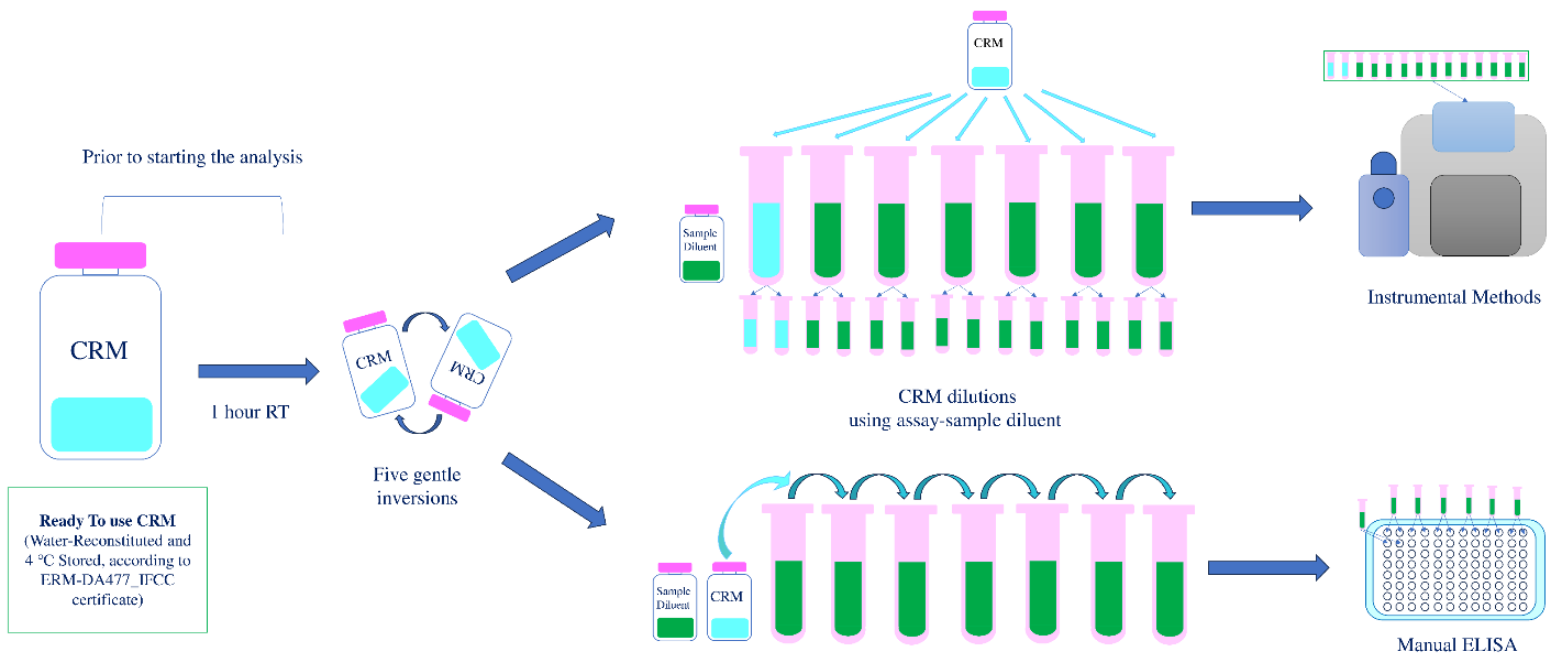

## Figure S2: CRM's activity against D1 and D4-5 of $\beta$ 2GPI

A) For QUANTA Flash<sup>®</sup>  $\beta$ 2GPI-Domain 1 (701188) assay, we diluted water-reconstituted CRM in sample diluent and tested it at 100 % (undiluted), 25 % (1:4), and 6.3 % (1:16) percent dilution, relative to the dilution factor recommended to test serum samples (undiluted = 100%). We repeated the 25% condition in three independent assays.

B) For in-house anti- $\beta$ 2GPI D4-5 IgG ELISA detection, we diluted water-reconstituted CRM in sample diluent at the following percent concentrations, relative to the dilution factor recommended to test serum samples (1:101 = 100%): 315.6 % (1:32), 157.8 % (1:64), 78.9 % (1:128), 39.4 % (1:256), and 19.7 % (1:512). We tested all the conditions in duplicate in three independent runs.

| QUANTA Flash <sup>®</sup> anti-Domain1 IgG (INOVA) |            |                               |
|----------------------------------------------------|------------|-------------------------------|
| CRM dilution * (%)                                 | average CU | CV <sub>BetweenRuns</sub> (%) |
| 100                                                | > 1380.4   | -                             |
| 25                                                 | 426.3      | 6                             |
| 6.3                                                | 124.5      | -                             |

| ELISA anti-Domain4-5 IgG (in-house) |            |                               |
|-------------------------------------|------------|-------------------------------|
| CRM dilution * (%)                  | average OD | CV <sub>BetweenRuns</sub> (%) |
| 315.6                               | 0.687      | 15                            |
| 157.8                               | 0.468      | 16                            |
| 78.9                                | 0.284      | 10                            |
| 39.4                                | 0.159      | 12                            |
| 19.7                                | 0.087      | 13                            |

\* relative to the dilution factor recommended for patient samples

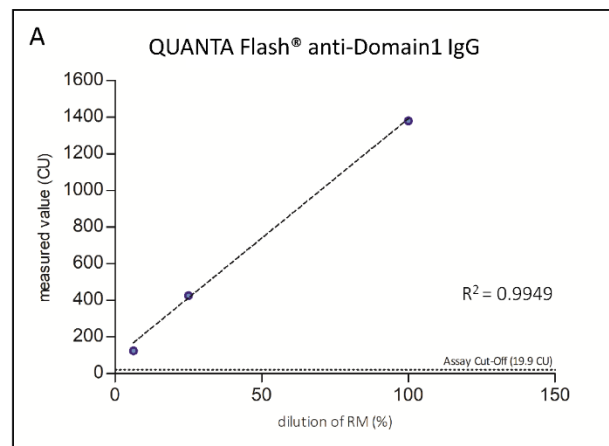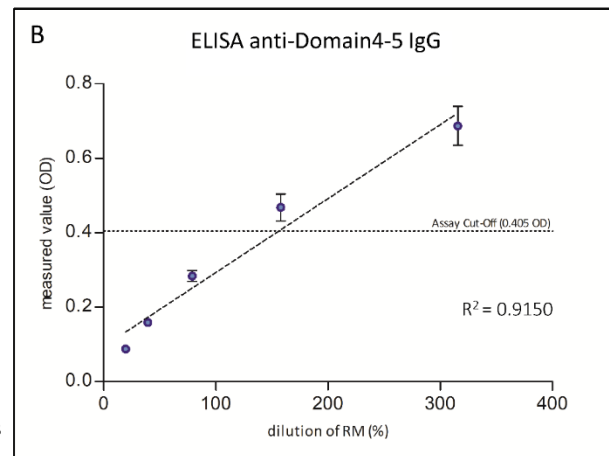

## References

1. Artenjak A, Leonardi A, Križaj I, Ambrožič A, Sodin-Semrl S, Božič B, et al. Optimization of unnicked  $\beta$ 2-glycoprotein I and high avidity anti- $\beta$ 2-glycoprotein I antibodies isolation. J Immunol Res. 2014;2014:195687.
2. Agostinis C, Durigutto P, Sblattero D, Borghi MO, Grossi C, Guida F, et al. A non-complement-fixing antibody to  $\beta$ 2 glycoprotein I as a novel therapy for antiphospholipid syndrome. Blood. 2014;123(22):3478-87.
